# Supplementary material
Source: publisher figshare collection journal article supplement (https://gsajournals.figshare.com/articles/dataset/_/9936284)
Supplement: Supplementary file 1 [file 1]

# Supplementary Tables: The genomic basis for short-term evolution of environmental adaptation in maize

Randall J. Wisser, Zhou Fang, James B. Holland, Juliana E. C. Teixeira, John Dougherty, Teclamarium Weldekidan, Natalia de Leon, Sherry Flint-Garcia, Nick Lauter, Seth C. Murray, Wenwei Xu, and Arnel Hallauer

Table S1: Quality control filtering of MaizeSNP50 data.

| Step | Filter Criterion                        | Markers <sup>a</sup> |
|------|-----------------------------------------|----------------------|
| 1    | Total Markers Pre-filter                | 56,110               |
| 2    | Inconsistent Between Replicated Samples | 141                  |
| 3    | GenTrain Score < 0.6                    | 4467                 |
| 4    | Missing Data $\geq$ 20%                 | 1385                 |
| 5    | Unknown Map Location <sup>b</sup>       | 499                  |
| 6    | Redundant Markers                       | 141                  |
| 7    | Monomorphic Markers                     | 1825                 |
| 8    | < 2 Genotype Classes                    | 35                   |
| 9    | No Heterozygous Genotypes               | 102                  |

<sup>a</sup>Filtering based on B73 AGPv2 map.

Table S2: Subsets of MaizeSNP50 markers used for different analyses.

| Set | Map Filter | Feature Filter                                                                                                 | No. Markers         | Analysis                                                             |
|-----|------------|----------------------------------------------------------------------------------------------------------------|---------------------|----------------------------------------------------------------------|
| A   | AGPv2      | Total SNPs post quality control                                                                                | 47,518 <sup>a</sup> | –                                                                    |
| B   | AGPv2      | Minor allele count $\geq 12$                                                                                   | 44,445              | Diversity summary statistics                                         |
| C   | AGPv2      | PZA/PZE markers; No missing data; Minor Allele Count $\geq 12$ ; Shared with 553 external samples <sup>b</sup> | 9348                | PHATE                                                                |
| D   | AGPv2      | PZA/PZE markers; No missing data; Minor allele count $\geq 12$ ; Inter-marker distances $> 0.05$ cM            | 3213                | STRUCTURE ( $g_0$ )                                                  |
| E   | AGPv2      | PZA/PZE markers; No missing data; Minor allele count $\geq 12$ ; Inter-marker distances $> 0.05$ cM            | 3718                | STRUCTURE (ancestry of $g_2$ individuals given $g_0$ subpopulations) |
| F   | AGPv4      | PZA/PZE markers; No missing data; Minor Allele Count $\geq 12$                                                 | 8894                | Genome-wide and chromosome-specific genomic relationship matrices    |
| G   | AGPv4      | PZA/PZE markers; No missing data; Minor Allele Count $\geq 12$                                                 | 7572                | SIM <sup>-</sup> genomic relationship matrices                       |
| H   | AGPv4      | PZA/PZE markers; No missing data; Minor Allele Count $\geq 12$                                                 | 1322                | SIM <sup>+</sup> genomic relationship matrices                       |
| I   | AGPv4      | $g_0$ -specific minor allele count $\geq 12$                                                                   | 33,533              | LD (all pairwise within chromosomes – $g_0$ )                        |
| J   | AGPv4      | $g_2$ -specific minor allele count $\geq 12$                                                                   | 26,975              | LD (all pairwise within chromosomes – $g_2$ )                        |
| K   | AGPv4      | $g_4$ -specific minor allele count $\geq 12$                                                                   | 26,655              | LD (all pairwise within chromosomes – $g_4$ )                        |
| L   | AGPv4      | $g_6$ -specific minor allele count $\geq 12$                                                                   | 28,009              | LD (all pairwise within chromosomes – $g_6$ )                        |
| M   | AGPv4      | $g_8$ -specific minor allele count $\geq 12$                                                                   | 28,718              | LD (all pairwise within chromosomes – $g_8$ )                        |
| N   | AGPv4      | $g_{10}$ -specific minor allele count $\geq 12$                                                                | 28,492              | LD (all pairwise within chromosomes – $g_{10}$ )                     |
| O   | AGPv4      | PZA/PZE markers; No missing data; $g_0$ -specific minor allele count $\geq 12$                                 | 5925                | LD (all pairwise between chromosomes – $g_0$ )                       |
| P   | AGPv4      | PZA/PZE markers; No missing data; $g_2$ -specific minor allele count $\geq 12$                                 | 4017                | LD (all pairwise between chromosomes – $g_2$ )                       |
| Q   | AGPv4      | PZA/PZE markers; No missing data; $g_4$ -specific minor allele count $\geq 12$                                 | 3948                | LD (all pairwise between chromosomes – $g_4$ )                       |
| R   | AGPv4      | PZA/PZE markers; No missing data; $g_6$ -specific minor allele count $\geq 12$                                 | 4364                | LD (all pairwise between chromosomes – $g_6$ )                       |
| S   | AGPv4      | PZA/PZE markers; No missing data; $g_8$ -specific minor allele count $\geq 12$                                 | 4595                | LD (all pairwise between chromosomes – $g_8$ )                       |
| T   | AGPv4      | PZA/PZE markers; No missing data; $g_{10}$ -specific minor allele count $\geq 12$                              | 4589                | LD (all pairwise between chromosomes – $g_{10}$ )                    |
| U   | AGPv4      | No missing data; Minor allele count $\geq 12$                                                                  | 38,296              | LD (sequential pairs – all generations)                              |
| V   | AGPv4      | Minor allele count $\geq 12$                                                                                   | 43,628              | SIM; Bayenv; FITR                                                    |
| W   | AGPv4      | Minor Allele Count $\geq 12$ ; Minimum of five phenotyped individuals per genotypic class                      | 43,403              | GWA                                                                  |

<sup>a</sup>The total number of QC markers includes 47,515 SNPs from the MaizeSNP50 chip (Table S1) plus three *ZmCCT10*-associated markers that were separately assayed.

<sup>b</sup>External refers to samples from Ganai *et al.* (2011) PLoS One 6:e28334.

Table S3: Admixture proportions estimated at  $K = 6$  for samples from  $g_0$ .

| Sample name   | Sample ID | 1    | 2    | 3    | 4    | 5    | 6    | Max proportion |
|---------------|-----------|------|------|------|------|------|------|----------------|
| C0_062314_043 | 39        | 0.28 | 0.01 | 0.05 | 0.23 | 0.17 | 0.27 | 1              |
| C0_062314_054 | 50        | 0.74 | 0.01 | 0.00 | 0.17 | 0.06 | 0.03 | 1              |
| C0_168_1      | 100       | 0.81 | 0.01 | 0.04 | 0.12 | 0.02 | 0.01 | 1              |
| C0_062314_038 | 34        | 0.89 | 0.00 | 0.00 | 0.11 | 0.00 | 0.00 | 1              |
| C0_062314_080 | 73        | 0.89 | 0.00 | 0.00 | 0.10 | 0.00 | 0.01 | 1              |
| C0_062314_044 | 40        | 0.90 | 0.01 | 0.00 | 0.09 | 0.00 | 0.00 | 1              |
| C0_164_3      | 90        | 0.92 | 0.00 | 0.00 | 0.07 | 0.00 | 0.00 | 1              |
| C0_062314_055 | 51        | 0.92 | 0.00 | 0.00 | 0.07 | 0.00 | 0.00 | 1              |
| C0_062314_015 | 13        | 0.92 | 0.00 | 0.00 | 0.07 | 0.00 | 0.00 | 1              |
| C0_062314_096 | 86        | 0.94 | 0.00 | 0.00 | 0.06 | 0.00 | 0.00 | 1              |
| C0_062314_061 | 57        | 0.96 | 0.00 | 0.00 | 0.04 | 0.00 | 0.00 | 1              |
| C0_062314_046 | 42        | 0.99 | 0.00 | 0.00 | 0.00 | 0.00 | 0.00 | 1              |
| C0_165_1      | 93        | 0.99 | 0.00 | 0.00 | 0.00 | 0.00 | 0.00 | 1              |
| C0_168_2      | 101       | 1.00 | 0.00 | 0.00 | 0.00 | 0.00 | 0.00 | 1              |
| C0_062314_077 | 71        | 1.00 | 0.00 | 0.00 | 0.00 | 0.00 | 0.00 | 1              |
| C0_062314_010 | 8         | 1.00 | 0.00 | 0.00 | 0.00 | 0.00 | 0.00 | 1              |
| C0_062314_094 | 84        | 0.00 | 0.51 | 0.00 | 0.49 | 0.00 | 0.00 | 2              |
| C0_062314_050 | 46        | 0.00 | 0.55 | 0.00 | 0.45 | 0.00 | 0.00 | 2              |
| C0_062314_023 | 20        | 0.00 | 1.00 | 0.00 | 0.00 | 0.00 | 0.00 | 2              |
| C0_062314_067 | 63        | 0.00 | 1.00 | 0.00 | 0.00 | 0.00 | 0.00 | 2              |
| C0_062314_095 | 85        | 0.00 | 1.00 | 0.00 | 0.00 | 0.00 | 0.00 | 2              |
| C0_062314_037 | 33        | 0.00 | 1.00 | 0.00 | 0.00 | 0.00 | 0.00 | 2              |
| C0_062314_090 | 80        | 0.00 | 1.00 | 0.00 | 0.00 | 0.00 | 0.00 | 2              |
| C0_062314_042 | 38        | 0.00 | 1.00 | 0.00 | 0.00 | 0.00 | 0.00 | 2              |
| C0_062314_070 | 65        | 0.00 | 1.00 | 0.00 | 0.00 | 0.00 | 0.00 | 2              |
| C0_062314_084 | 76        | 0.00 | 1.00 | 0.00 | 0.00 | 0.00 | 0.00 | 2              |
| C0_062314_002 | 1         | 0.00 | 1.00 | 0.00 | 0.00 | 0.00 | 0.00 | 2              |
| C0_062314_018 | 15        | 0.00 | 1.00 | 0.00 | 0.00 | 0.00 | 0.00 | 2              |
| C0_062314_025 | 22        | 0.00 | 1.00 | 0.00 | 0.00 | 0.00 | 0.00 | 2              |
| C0_062314_028 | 25        | 0.00 | 1.00 | 0.00 | 0.00 | 0.00 | 0.00 | 2              |
| C0_062314_036 | 32        | 0.00 | 1.00 | 0.00 | 0.00 | 0.00 | 0.00 | 2              |
| C0_062314_051 | 47        | 0.00 | 1.00 | 0.00 | 0.00 | 0.00 | 0.00 | 2              |
| C0_062314_034 | 30        | 0.00 | 0.95 | 0.00 | 0.05 | 0.00 | 0.00 | 2              |
| C0_062314_021 | 18        | 0.01 | 0.56 | 0.00 | 0.03 | 0.37 | 0.03 | 2              |
| C0_062314_053 | 49        | 0.10 | 0.51 | 0.05 | 0.18 | 0.14 | 0.03 | 2              |
| C0_062314_072 | 67        | 0.46 | 0.52 | 0.00 | 0.02 | 0.00 | 0.00 | 2              |
| C0_166_2      | 97        | 0.00 | 0.00 | 1.00 | 0.00 | 0.00 | 0.00 | 3              |
| C0_062314_035 | 31        | 0.00 | 0.00 | 1.00 | 0.00 | 0.00 | 0.00 | 3              |
| C0_062314_047 | 43        | 0.00 | 0.00 | 1.00 | 0.00 | 0.00 | 0.00 | 3              |
| C0_062314_057 | 53        | 0.00 | 0.00 | 1.00 | 0.00 | 0.00 | 0.00 | 3              |
| C0_062314_059 | 55        | 0.00 | 0.00 | 1.00 | 0.00 | 0.00 | 0.00 | 3              |
| C0_062314_064 | 60        | 0.00 | 0.00 | 1.00 | 0.00 | 0.00 | 0.00 | 3              |
| C0_165_3      | 95        | 0.00 | 0.00 | 1.00 | 0.00 | 0.00 | 0.00 | 3              |
| C0_166_1      | 96        | 0.00 | 0.00 | 1.00 | 0.00 | 0.00 | 0.00 | 3              |
| C0_062314_005 | 4         | 0.00 | 0.41 | 0.51 | 0.08 | 0.00 | 0.00 | 3              |
| C0_062314_074 | 69        | 0.00 | 0.00 | 1.00 | 0.00 | 0.00 | 0.00 | 3              |
| C0_062314_066 | 62        | 0.00 | 0.00 | 0.98 | 0.01 | 0.00 | 0.00 | 3              |
| C0_062314_016 | 14        | 0.38 | 0.00 | 0.61 | 0.00 | 0.00 | 0.00 | 3              |
| C0_062314_060 | 56        | 0.39 | 0.00 | 0.53 | 0.07 | 0.00 | 0.01 | 3              |
| C0_062314_092 | 82        | 0.47 | 0.00 | 0.53 | 0.00 | 0.00 | 0.00 | 3              |
| C0_062314_014 | 12        | 0.00 | 0.00 | 0.00 | 1.00 | 0.00 | 0.00 | 4              |
| C0_062314_027 | 24        | 0.00 | 0.00 | 0.00 | 1.00 | 0.00 | 0.00 | 4              |
| C0_062314_056 | 52        | 0.00 | 0.00 | 0.00 | 1.00 | 0.00 | 0.00 | 4              |
| C0_062314_058 | 54        | 0.00 | 0.00 | 0.00 | 1.00 | 0.00 | 0.00 | 4              |
| C0_062314_082 | 74        | 0.00 | 0.00 | 0.00 | 1.00 | 0.00 | 0.00 | 4              |

Table S3: continued from previous page.

| Sample name   | Sample ID | 1    | 2    | 3    | 4    | 5    | 6    | Max proportion |
|---------------|-----------|------|------|------|------|------|------|----------------|
| C0_062314_087 | 78        | 0.00 | 0.00 | 0.00 | 1.00 | 0.00 | 0.00 | 4              |
| C0_062314_097 | 87        | 0.00 | 0.00 | 0.00 | 1.00 | 0.00 | 0.00 | 4              |
| C0_062314_031 | 28        | 0.00 | 0.35 | 0.00 | 0.65 | 0.00 | 0.00 | 4              |
| C0_062314_062 | 58        | 0.00 | 0.36 | 0.00 | 0.64 | 0.00 | 0.00 | 4              |
| C0_062314_024 | 21        | 0.00 | 0.38 | 0.00 | 0.62 | 0.00 | 0.00 | 4              |
| C0_062314_004 | 3         | 0.00 | 0.38 | 0.00 | 0.62 | 0.00 | 0.00 | 4              |
| C0_062314_073 | 68        | 0.00 | 0.39 | 0.00 | 0.61 | 0.00 | 0.00 | 4              |
| C0_164_1      | 88        | 0.00 | 0.39 | 0.00 | 0.61 | 0.00 | 0.00 | 4              |
| C0_062314_039 | 35        | 0.00 | 0.42 | 0.00 | 0.58 | 0.00 | 0.00 | 4              |
| C0_062314_048 | 44        | 0.00 | 0.42 | 0.00 | 0.58 | 0.00 | 0.00 | 4              |
| C0_062314_065 | 61        | 0.00 | 0.43 | 0.00 | 0.57 | 0.00 | 0.00 | 4              |
| C0_171_1      | 105       | 0.00 | 0.46 | 0.00 | 0.54 | 0.00 | 0.00 | 4              |
| C0_062314_012 | 10        | 0.00 | 0.46 | 0.00 | 0.54 | 0.00 | 0.00 | 4              |
| C0_062314_041 | 37        | 0.00 | 0.47 | 0.00 | 0.53 | 0.00 | 0.00 | 4              |
| C0_164_5      | 92        | 0.00 | 0.48 | 0.00 | 0.52 | 0.00 | 0.00 | 4              |
| C0_164_2      | 89        | 0.00 | 0.48 | 0.00 | 0.52 | 0.00 | 0.00 | 4              |
| C0_062314_049 | 45        | 0.00 | 0.48 | 0.00 | 0.52 | 0.00 | 0.00 | 4              |
| C0_062314_093 | 83        | 0.00 | 0.49 | 0.00 | 0.51 | 0.00 | 0.00 | 4              |
| C0_166_3      | 98        | 0.00 | 0.49 | 0.00 | 0.51 | 0.00 | 0.00 | 4              |
| C0_062314_009 | 7         | 0.00 | 0.49 | 0.00 | 0.51 | 0.00 | 0.00 | 4              |
| C0_062314_068 | 64        | 0.00 | 0.49 | 0.00 | 0.51 | 0.00 | 0.00 | 4              |
| C0_062314_063 | 59        | 0.00 | 0.50 | 0.00 | 0.50 | 0.00 | 0.00 | 4              |
| C0_169_2      | 103       | 0.02 | 0.00 | 0.00 | 0.69 | 0.29 | 0.00 | 4              |
| C0_167_2      | 99        | 0.04 | 0.00 | 0.06 | 0.68 | 0.14 | 0.07 | 4              |
| C0_062314_083 | 75        | 0.10 | 0.00 | 0.04 | 0.68 | 0.09 | 0.09 | 4              |
| C0_062314_086 | 77        | 0.39 | 0.01 | 0.00 | 0.59 | 0.01 | 0.00 | 4              |
| C0_062314_040 | 36        | 0.39 | 0.00 | 0.00 | 0.61 | 0.00 | 0.00 | 4              |
| C0_062314_011 | 9         | 0.42 | 0.01 | 0.00 | 0.57 | 0.00 | 0.00 | 4              |
| C0_169_1      | 102       | 0.42 | 0.00 | 0.00 | 0.58 | 0.00 | 0.00 | 4              |
| C0_062314_020 | 17        | 0.00 | 0.00 | 0.00 | 0.27 | 0.73 | 0.00 | 5              |
| C0_062314_022 | 19        | 0.00 | 0.00 | 0.00 | 0.27 | 0.72 | 0.00 | 5              |
| C0_062314_052 | 48        | 0.00 | 0.00 | 0.00 | 0.25 | 0.75 | 0.00 | 5              |
| C0_165_2      | 94        | 0.00 | 0.03 | 0.00 | 0.21 | 0.76 | 0.00 | 5              |
| C0_164_4      | 91        | 0.00 | 0.00 | 0.00 | 0.25 | 0.74 | 0.00 | 5              |
| C0_062314_030 | 27        | 0.01 | 0.00 | 0.00 | 0.22 | 0.77 | 0.00 | 5              |
| C0_169_3      | 104       | 0.13 | 0.01 | 0.01 | 0.21 | 0.37 | 0.27 | 5              |
| C0_062314_033 | 29        | 0.00 | 0.00 | 0.00 | 0.00 | 0.00 | 1.00 | 6              |
| C0_062314_013 | 11        | 0.00 | 0.00 | 0.00 | 0.01 | 0.00 | 0.99 | 6              |
| C0_062314_006 | 5         | 0.00 | 0.00 | 0.00 | 0.00 | 0.00 | 0.99 | 6              |
| C0_062314_003 | 2         | 0.01 | 0.00 | 0.00 | 0.10 | 0.00 | 0.88 | 6              |
| C0_062314_026 | 23        | 0.06 | 0.00 | 0.01 | 0.17 | 0.03 | 0.73 | 6              |
| C0_062314_088 | 79        | 0.09 | 0.01 | 0.00 | 0.08 | 0.00 | 0.83 | 6              |
| C0_062314_019 | 16        | 0.09 | 0.02 | 0.00 | 0.12 | 0.00 | 0.77 | 6              |
| C0_062314_078 | 72        | 0.10 | 0.01 | 0.03 | 0.11 | 0.00 | 0.76 | 6              |
| C0_062314_071 | 66        | 0.13 | 0.04 | 0.00 | 0.13 | 0.05 | 0.64 | 6              |
| C0_062314_045 | 41        | 0.14 | 0.01 | 0.00 | 0.08 | 0.02 | 0.75 | 6              |
| C0_062314_029 | 26        | 0.17 | 0.00 | 0.00 | 0.16 | 0.07 | 0.59 | 6              |
| C0_062314_091 | 81        | 0.20 | 0.04 | 0.01 | 0.13 | 0.06 | 0.55 | 6              |
| C0_062314_007 | 6         | 0.22 | 0.02 | 0.02 | 0.24 | 0.13 | 0.37 | 6              |
| C0_062314_076 | 70        | 0.24 | 0.08 | 0.08 | 0.14 | 0.12 | 0.34 | 6              |

Table S4: Comparison of the proportion of individuals in each subpopulation of  $g_0$  to the corresponding subpopulation admixture proportion in  $g_2$ .

| Subpopulation | Proportion of $g_0$ individuals in subpopulation <sup>a</sup> | Mean proportion of ancestry for $g_2$ individuals <sup>a</sup> |
|---------------|---------------------------------------------------------------|----------------------------------------------------------------|
| 1             | 0.15                                                          | 0.13                                                           |
| 2             | 0.19                                                          | 0.22                                                           |
| 3             | 0.13                                                          | 0.07                                                           |
| 4             | 0.32                                                          | 0.42                                                           |
| 5             | 0.07                                                          | 0.06                                                           |
| 6             | 0.13                                                          | 0.10                                                           |

<sup>a</sup>The two vectors are highly correlated and not significantly different ( $t = -0.07$ ;  $p = 0.945$ ).

Table S5: Regions of the genome identified by kernel regression analysis of SIM test results.

| Region | Chr | AGPv4-left | AGPv4-right | cM-left | cM-right | SIM <sup>+</sup> <sup>a</sup> |
|--------|-----|------------|-------------|---------|----------|-------------------------------|
| 1      | 1   | 140265874  | 141784033   | 89.49   | 89.51    | 6                             |
| 2      | 1   | 232258157  | 235649350   | 135.40  | 137.75   | 31                            |
| 3      | 1   | 271957876  | 274610467   | 160.53  | 162.40   | 32                            |
| 4      | 2   | 80486563   | 82278954    | 73.53   | 73.71    | 14                            |
| 5      | 2   | 167628942  | 168147089   | 82.51   | 82.59    | 4                             |
| 6      | 2   | 210883668  | 212206641   | 109.33  | 110.76   | 10                            |
| 7      | 3   | 115123631  | 118593844   | 59.00   | 59.27    | 22                            |
| 8      | 4   | 39269834   | 43845553    | 51.19   | 52.15    | 25                            |
| 9      | 4   | 99643728   | 108146674   | 57.85   | 58.08    | 14                            |
| 10     | 4   | 189093568  | 192689956   | 98.49   | 102.35   | 24                            |
| 11     | 4   | 230198325  | 231781194   | 114.31  | 114.66   | 13                            |
| 12     | 5   | 68261863   | 71509380    | 64.55   | 65.32    | 22                            |
| 13     | 5   | 85945163   | 90344713    | 68.44   | 69.27    | 34                            |
| 14     | 5   | 111272484  | 113207281   | 70.52   | 70.62    | 10                            |
| 15     | 5   | 119329575  | 124643535   | 70.94   | 71.22    | 11                            |
| 16     | 5   | 135998724  | 143453372   | 71.81   | 72.20    | 46                            |
| 17     | 5   | 149166680  | 151756778   | 72.49   | 72.91    | 19                            |
| 18     | 6   | 138083969  | 139243488   | 51.93   | 52.59    | 33                            |
| 19     | 7   | 153336525  | 155503321   | 80.64   | 82.70    | 19                            |
| 20     | 8   | 42896269   | 58359331    | 45.41   | 50.04    | 117                           |
| 21     | 9   | 29355770   | 36335089    | 43.00   | 43.40    | 55                            |
| 22     | 9   | 39449354   | 51050725    | 43.57   | 44.23    | 101                           |
| 23     | 9   | 68801309   | 91882695    | 45.23   | 46.53    | 184                           |
| 24     | 9   | 105916829  | 107329955   | 49.90   | 50.49    | 8                             |
| 25     | 9   | 116149304  | 126635638   | 54.17   | 59.38    | 81                            |
| 26     | 10  | 58200959   | 62904445    | 37.46   | 37.74    | 41                            |
| 27     | 10  | 80774127   | 80878696    | 39.32   | 39.34    | 1                             |
| 28     | 10  | 89308334   | 90682008    | 40.98   | 41.25    | 9                             |
| 29     | 10  | 134353483  | 136247228   | 59.14   | 61.32    | 22                            |

<sup>a</sup>Number of SIM<sup>+</sup> markers ( $q < 0.01$ ) within each of the 29 SIM<sup>+</sup><sub>regions</sub>.

Table S6: Additive, dominance and residual genetic variance component estimates per chromosome.

| Chr | Additive variance (chr) <sup>a</sup> | Dominance variance (chr) | Additive variance (sans chr) | Dominance variance (sans chr) | Residual genetic variance | No. Markers <sup>b</sup> | SIM <sup>+</sup> <sup>c</sup> |
|-----|--------------------------------------|--------------------------|------------------------------|-------------------------------|---------------------------|--------------------------|-------------------------------|
| 1   | 4.8                                  | 2.4                      | 22.3                         | 3.1                           | 0.0                       | 1525                     | 976                           |
| 2   | 0.0                                  | 0.0                      | 27.2                         | 5.4                           | 0.0                       | 1241                     | 538                           |
| 3   | 4.1                                  | 0.7                      | 23.6                         | 4.3                           | 0.0                       | 1140                     | 623                           |
| 4   | 2.3                                  | 0.1                      | 25.2                         | 5.0                           | 0.0                       | 1244                     | 692                           |
| 5   | 2.3                                  | 0.0                      | 25.1                         | 5.2                           | 0.0                       | 1023                     | 793                           |
| 6   | 0.7                                  | 0.0                      | 27.0                         | 5.2                           | 0.0                       | 786                      | 277                           |
| 7   | 2.0                                  | 0.0                      | 25.6                         | 5.0                           | 0.0                       | 825                      | 436                           |
| 8   | 2.0                                  | 4.9                      | 25.7                         | 0.0                           | 0.0                       | 906                      | 501                           |
| 9   | 4.3                                  | 0.0                      | 23.6                         | 5.0                           | 0.0                       | 766                      | 775                           |
| 10  | 8.1                                  | 2.3                      | 21.0                         | 3.1                           | 0.0                       | 742                      | 504                           |

<sup>a</sup>Additive and dominance variances estimated from the fitted **G** and **D** matrices respectively, constructed with markers from the corresponding chromosome (“chr”) and the remaining chromosomes (“sans chr”).

<sup>b</sup>Number of markers in SNP set F (Table S2) used to estimate chromosome-specific genetic variances.

<sup>c</sup>Number of SIM<sup>+</sup> markers.

Table S7: Markers significantly associated with phenotypic variation in flowering time identified by genome-wide association tests under a 10% FDR threshold.

| Marker        | Chr | AGPv4       | SIM ( $q$ ) | FITR (BPP) <sup>a</sup> | GWA ( $q$ ) | Minor Allele <sup>b,c</sup> | Beta <sup>d</sup> | Additive effect <sup>e</sup> |
|---------------|-----|-------------|-------------|-------------------------|-------------|-----------------------------|-------------------|------------------------------|
| PZE.101091520 | 1   | 85,230,603  | 0.1072      | 0                       | 0.0758      | G                           | -0.0166           | 4.2                          |
| PZE.101162348 | 1   | 208,360,266 | 0.0044      | 0                       | 0.0060      | A                           | -0.0133           | -1.4                         |
| PZE.102146567 | 2   | 199,515,336 | 0.0724      | 0                       | 0.0296      | G                           | -0.0151           | 4.6                          |
| PZE.104005434 | 4   | 1,474,971   | 0.0355      | 0                       | 0.0758      | G                           | 0.0139            | -4.5                         |
| PZE.104069513 | 4   | 141,309,604 | 0.0285      | 0                       | 0.0758      | A                           | -0.0135           | 2.5                          |
| PZE.105112537 | 5   | 173,406,538 | 0.2925      | 0                       | 0.0178      | A                           | -0.0047           | 10.2                         |
| SYN38278      | 5   | 205,090,726 | 0.4219      | 0                       | 0.0178      | A                           | -0.0050           | 7.9                          |
| SYN29958      | 7   | 136,246,166 | 0.2116      | 0                       | 0.0701      | G                           | 0.0136            | -2.0                         |
| PZE.108080696 | 8   | 141,126,129 | 0.2832      | 0                       | 0.0758      | A                           | -0.0029           | 8.4                          |
| ZmCCT10_CACTA | 10  | 94,435,768  | 0.0000      | 0                       | 0.0001      | D                           | -0.0190           | 12.3                         |
| PZE.110050177 | 10  | 94,908,997  | 0.0021      | 0                       | 0.0130      | A                           | -0.0192           | 6.3                          |
| PZE.110055163 | 10  | 106,558,205 | 0.0571      | 0                       | 0.0701      | A                           | -0.0107           | 7.8                          |

<sup>a</sup>FITR bootstrap proportion.

<sup>b</sup>Reference allele for estimated effect in table.

<sup>c</sup>D: "deletion" (lack of insertion) allele at the presence-absence causal variant of *ZmCCT10*.

<sup>d</sup>Slope in allele frequency change.

<sup>e</sup>Given the estimated allele effect for PZE.101162348, the slope in allele frequency change across generations has the unexpected sign.



Table S8: The candidate gene for flowering time nearest to each GWA<sup>+</sup> marker in S7 Table.

| Marker        | Chr | AGPv4       | Nearest gene                        | Distance from marker (bp) <sup>a</sup> |
|---------------|-----|-------------|-------------------------------------|----------------------------------------|
| PZE.101091520 | 1   | 85,230,603  | CCT(ghd7-like) (Zm00001d029885)     | -6,987,083                             |
| PZE.101162348 | 1   | 208,360,266 | SPY (Zm00001d031938)                | -885,523                               |
| PZE.102146567 | 2   | 199,515,336 | FT (Zm00001d006116)                 | -454,929                               |
| PZE.104005434 | 4   | 1,474,971   | CCT(ghd7-like) (Zm00001d049347)     | -25,840,962                            |
| PZE.104069513 | 4   | 141,309,604 | TOC1 (Zm00001d051114)               | -2,558,009                             |
| PZE.105112537 | 5   | 173,406,538 | CRY1 (Zm00001d016915)               | -6,349,176                             |
| SYN38278      | 5   | 205,090,726 | CIB1 (Zm00001d017777)               | -1,323,207                             |
| SYN29958      | 7   | 136,246,166 | AtDOF{1.6,3.4,5.8} (Zm00001d020837) | 1,892,764                              |
| PZE.108080696 | 8   | 141,126,129 | rap2.7 (Zm00001d010987)             | 5,113,282                              |
| ZmCCT10_CACTA | 10  | 94,435,768  | CCT(ghd7-like) (Zm00001d024909)     | -2,499                                 |
| PZE.110050177 | 10  | 94,908,997  | CCT(ghd7-like) (Zm00001d024909)     | -475,728                               |
| PZE.110055163 | 10  | 106,558,205 | COP9 (Zm00001d025407)               | 11,125,411                             |

<sup>a</sup>Negative and positive values indicate gene locations that are upstream and downstream respectively of the associated variant.
